## **Discoidin Domain Receptor 2 regulates AT1 receptor expression in Angiotensin II-stimulated cardiac fibroblasts via fibronectin-dependent Integrin- $\beta$ 1 signalling**

Allen Sam Titus<sup>1</sup>, Harikrishnan V<sup>1</sup>, Mingyi Wang<sup>2</sup>, Edward G. Lakatta<sup>2</sup> and Shivakumar Kailasam<sup>1\*</sup>

### **Affiliation**

1. Division of Cellular and Molecular Cardiology, Sree Chitra Tirunal Institute for Medical Sciences and Technology, Trivandrum, Kerala, India
2. Laboratory of Cardiovascular Science, National Institute on Aging/National Institutes of Health, Baltimore, Maryland, USA

### **\* Corresponding author**

Dr Shivakumar Kailasam

Division of Cellular and Molecular Cardiology, Sree Chitra Tirunal Institute for Medical Sciences and Technology, Trivandrum, Kerala, India. Email: [drkshiva19@gmail.com](mailto:drkshiva19@gmail.com)

### **Declaration**

#### **Funding**

This work was supported by a Research Grant (BT/PR23486/BRB/10/1589/2017) to SK from the Department of Biotechnology, Government of India, and Research Fellowships from SCTIMST, Trivandrum, to AST and the Department of Biotechnology, Government of India, to HV. The source of funding for WM and EGL was the Intramural Research Program of the National Institute on Aging, National Institutes of Health.

#### **Disclosures**

No conflicts of interest, financial or otherwise, are declared by the authors

#### **Author contributions**

AST, SK, EGL, HV and MW conceived the study; AST and SK designed the study; AST and HV performed the experiments; AST, HV and SK analyzed the data; AST, HV and SK interpreted the results of the experiments; AST prepared the Figures; AST and SK drafted the manuscript; AST, HV, MW, EGL and SK reviewed the manuscript and approved the final version of the manuscript.

## **Ethics approval**

The study on rats was approved by the Institutional Animal Ethics Committee of SCTIMST (B form No: SCT/IAEC-233/AUGUST/2017/94).

## **Abstract**

Fibronectin is an extracellular matrix glycoprotein with a regulatory role in fundamental cellular processes. Recent reports on the cardioprotective effect of fibronectin inhibition in a setting of myocardial injury suggest a role for fibronectin in cardiac fibroblast function, which remains largely unexplored. This study probed the molecular basis and functional implications of fibronectin gene expression in cardiac fibroblasts exposed to Angiotensin II, a potent pro-fibrotic factor in the myocardium. Using gene knockdown and over-expression approaches, western blotting and promoter pull-down assay, we show that collagen type I-activated Discoidin Domain Receptor 2 (DDR2) mediates Angiotensin II-stimulated transcriptional up-regulation of fibronectin expression by Yes-activated Protein in cardiac fibroblasts. Further, siRNA-mediated fibronectin knockdown attenuated Angiotensin II-dependent expression of anti-apoptotic cIAP2 and promoted cell death under oxidative stress. Fibronectin was also found to mediate Angiotensin II-stimulated collagen type I expression. Importantly, an obligate role for fibronectin was observed in Angiotensin II-stimulated expression of its receptor, AT1R, which would link ECM signalling and Angiotensin II signalling in cardiac fibroblasts. Moreover, the regulatory role of DDR2-dependent fibronectin expression in Ang II-stimulated cIAP2, collagen type I and AT1R expression was mediated by Integrin- $\beta$ 1-integrin-linked kinase signalling. The pro-survival role of fibronectin in cardiac fibroblasts and its regulatory role in collagen and AT1R expression, downstream of DDR2, could be critical determinants of cardiac fibroblast-mediated wound healing following myocardial injury. Our findings point to a complex mechanism of regulation of cardiac fibroblast function involving two major extracellular matrix proteins, collagen type I and fibronectin, and their receptors, DDR2 and Integrin- $\beta$ 1. (250 words)

## **Key words**

Cardiac fibroblasts, DDR2, Fibronectin, Integrin- $\beta$ 1, Angiotensin II, AT1 receptor

## Introduction

Cardiac fibroblasts are importantly involved in wound healing and tissue remodelling in the injured myocardium (1). In a setting of myocardial damage, normally quiescent cardiac fibroblasts, under the influence of pro-fibrotic factors such as Angiotensin II (Ang II), are phenotypically transformed into  $\alpha$ -smooth muscle actin ( $\alpha$ -SMA)-positive myofibroblasts that infiltrate the site of injury, proliferate and produce collagen and other extracellular matrix (ECM) components, leading to the formation of a collagenous scar tissue that aids wound repair and preserves myocardial integrity in the short-term. However, unlike in non-cardiac tissues, active myofibroblasts in the heart resist apoptosis and persist in the infarct scar long after termination of the healing response, which results in excessive collagen deposition, adverse tissue fibrosis and compromised ventricular compliance in the long-term (1). Clearly, delineation of molecular mechanisms underlying cardiac fibroblast function and cardiac fibrosis is a clinically-relevant goal.

Although earlier studies on cardiac fibrosis had focused on collagen type I as a major contributor to the progression of tissue fibrosis (2), there is now increasing appreciation of the role of fibronectin, an ECM glycoprotein, as an important regulator of ECM and tissue remodelling (3). In fact, recent studies have considered fibronectin as a potential target to limit tissue fibrosis (4). Inhibition of fibronectin polymerization is reported to reduce collagen deposition into the ECM, and exert cardioprotective effect through attenuation of cardiac fibroblast proliferation and adverse fibrotic remodelling of the heart in an ischemia-reperfusion model (4). These observations suggest a role for fibronectin in cardiac fibroblast function and cardiac fibrosis and provide compelling rationale for further studies on the regulation of fibronectin expression in cardiac fibroblasts and the mechanisms that underlie its regulatory role in these cells.

We had recently reported that Ang II, a potent pro-fibrotic factor whose intracardiac levels are increased following myocardial injury (5), enhances the expression of Discoidin Domain Receptor 2 (DDR2), a collagen receptor tyrosine kinase, which, upon activation by collagen, has an indispensable regulatory role in the expression of collagen type I in Ang II-stimulated cardiac fibroblasts (2, 6). Ang II also induces anti-apoptotic cIAP2 that protects cardiac fibroblasts against ambient stress (7). Interestingly, the pro-survival role

of Ang II in cardiac fibroblasts via cIAP2 was also found to be mediated by collagen type I-activated DDR2.

As a sequel to our earlier findings, we now report that DDR2 has an obligate role in Yes-activated Protein (YAP)-mediated transcriptional up-regulation of fibronectin expression by Ang II in cardiac fibroblasts. Downstream of DDR2, fibronectin mediates Ang II-stimulated collagen type I expression and cIAP2-dependent apoptosis resistance in cardiac fibroblasts exposed to oxidative stress. Importantly, fibronectin has an obligate role in Ang II-stimulated expression of the Ang II receptor, AT1R, which would link ECM signalling to Ang II signalling that profoundly impacts cardiac fibroblast function. Interestingly, a combination of gene knockdown and over-expression approaches revealed that the regulatory role of fibronectin in cardiac fibroblasts is mediated by Integrin- $\beta$ 1 signalling. We propose that the pro-survival role of fibronectin and its regulatory role in collagen and AT1R expression, downstream of DDR2, could be critical determinants of cardiac fibroblast response to injury.

## **Materials and Methods**

### ***Materials***

Angiotensin II and M199 were obtained from Sigma-Aldrich, (St. Louis, MO, USA). Lipofectamine 2000 was from Invitrogen (Carlsbad, CA, USA). The Low Cell<sup>#</sup> ChIP kit protein A  $\times$  48 was from Diagenode (Denville, NJ, USA) and the Chemiluminescence western blot detection reagent from Thermo Fisher Scientific (Waltham, MA, USA). DDR2, Integrin- $\beta$ 1, ILK and control siRNAs were from Ambion (Foster City, CA, USA). Fibronectin siRNA was custom-synthesized by Eurogentec (Liège, Belgium). The rat DDR2/CD167b Gene ORF cDNA clone expression plasmid was obtained from Sino Biologicals (Beijing, China). P<sub>cax</sub> Itgb1-FLAG was a gift from Dennis Selkoe and Tracy Young-Pearse (Addgene plasmid 30153) (8). Opti-MEM and Fetal Calf Serum (FCS) were from GIBCO (Waltham, MA, USA). All cell culture ware was purchased from BD Falcon (Corning, NY USA). Primary antibodies against DDR2 and ILK was obtained from Cell Signaling Technology (Danvers, MA, USA). The primary antibodies for cIAP2, Fibronectin, AT1R and Collagen I were from Santa Cruz Biotechnology (Dallas, TX, USA). Loading control  $\beta$ -Actin antibody was obtained from Sigma-Aldrich (St. Louis, MO,

USA). All antibodies were used after dilution (1:1000). XBT X-ray Film was from Carestream (Rochester, NY, USA).

## **Methods**

### ***Isolation of cardiac fibroblasts***

Cardiac fibroblasts were isolated from young adult male Sprague–Dawley rats (2–3 months old) as described earlier (9). Sub-confluent cultures of cardiac fibroblasts from passage 2 or 3 were used for the experiments. Cells were serum-deprived for 24 h prior to treatment with 1 $\mu$ M Ang II. Cells were pre-incubated with 10 $\mu$ M Verteporfin for 1 h before the addition of 1 $\mu$ M Ang II in the appropriate group. The cells were collected and processed further to analyse the expression of various genes and proteins.

### ***Western blot analysis***

Sub-confluent cultures of cardiac fibroblasts in serum-free M199 were treated with Ang II (1 $\mu$ M) and relative protein abundance was determined by western blot analysis following standard protocols, with  $\beta$ -actin as loading control. Enhanced chemiluminescence reagent was used to detect the proteins with X-ray Film.

### ***RNA interference and over-expression***

Cardiac fibroblasts at passage 3 were seeded on 60 mm dishes at equal density. After 24 h, the cells were incubated in Opti-MEM for 5–6 h with Ambion pre-designed Silencer-Select siRNA or custom-designed siRNA from Eurogentec or scrambled siRNA (control siRNA) at the given concentrations (10 pmoles for both DDR2 and Integrin- $\beta$ 1, 20 pmoles for Fibronectin (mix of siRNA 1 and 2) and Lipofectamine 2000.

Constitutive expression of DDR2 and Integrin- $\beta$ 1 was achieved under the control of a CMV promoter. Both plasmids were verified by restriction mapping. For over-expression, the plasmid vector for DDR2 (2 $\mu$ g/ $\mu$ l) was transfected using Lipofectamine 2000. Following a post-transfection recovery phase in M199 with 10% FCS for 12 h, the cells were serum-deprived for 24 h and then treated with Ang II (1 $\mu$ M) for the indicated durations. Cell lysates were prepared in Laemmli sample buffer, denatured and used for western blot analysis.

### ***Chromatin Immunoprecipitation (ChIP) assay***

The ChIP assay was performed with the Low Cell Number ChIP kit, according to the manufacturer's protocol. Briefly, after treatment of cardiac fibroblasts with 1  $\mu$ M Ang II for 30 min, the cells were cross-linked with 1% formaldehyde, lysed and sonicated in a Diagenode Bioruptor to generate ~600 bp DNA fragments. The lysates were incubated with anti-YAP antibody overnight at 4°C with rotation. Immune complexes were precipitated with protein A-coated magnetic beads. After digestion with proteinase K to remove the DNA-protein cross-links from the immune complexes, the DNA was isolated and subjected to PCR using primers for the specific promoter regions. In samples immunoprecipitated with the YAP antibody, the fibronectin promoter region was amplified using FP-5' AAAACCGTTTTGTCAAGGGATG 3' and RP-5' TACCAGTTTCTTACAAGCGGTG 3'. DNA isolated from an aliquot of the total sheared chromatin was used as loading control for PCR (input control). ChIP with a non-specific antibody (normal rabbit IgG) served as negative control. The PCR products were subjected to electrophoresis on a 2% agarose gel.

### ***Statistical analysis***

Data are expressed as Mean $\pm$ SE. Statistical analysis was performed using Student's *t* test (unpaired, 2-tail) for comparisons involving 2 groups. For comparisons involving more than 2 groups, the data were analyzed by one-way ANOVA (with one variable) or two-way ANOVA (with two variable).  $p \leq 0.05$  was considered significant. The data presented are representative of 3 or 4 independent experiments (n=3 or 4), as indicated in the figure legends.

## **Results**

### ***DDR2 mediates Ang II-stimulated fibronectin expression in cardiac fibroblasts***

Treatment of cardiac fibroblasts with Ang II (1 $\mu$ M) enhanced fibronectin expression (~2-fold), with concomitant increase (~5-fold) in DDR2 expression (Figure 1A). Since enhanced DDR2 expression correlated with enhanced fibronectin expression, the effect of siRNA-mediated DDR2 knockdown on fibronectin expression was checked to ascertain if DDR2 regulates fibronectin. DDR2 knockdown significantly diminished Ang II-induced increase in fibronectin expression (Figure 1B). Further, inhibition of collagen type

I-dependent activation of DDR2 using WRG-28 (10) blocked Ang II-stimulated fibronectin expression (Figure 1C). Conversely, over-expression of DDR2 in un-stimulated cardiac fibroblasts led to up-regulation of fibronectin expression (Figure 1D), confirming the indispensable role of DDR2 in fibronectin expression.

### ***Transcriptional regulation of fibronectin by DDR2-activated YAP transcription co-activator***

Since YAP was earlier reported to be activated downstream of DDR2 (6), and bioinformatics analysis of the fibronectin promoter region showed a consensus binding site for TEAD (a YAP-co-activated transcription factor), we checked whether YAP inhibition would have an effect on fibronectin expression. YAP inhibition using a chemical inhibitor (verteporfin) or siRNA reduced Ang II-stimulated fibronectin expression (Figures 2A-B). Further, chromatin immunoprecipitation assay (ChIP) demonstrated YAP binding to the promoter region of fibronectin (containing TEAD consensus sequence) in Ang II-treated cells, which was attenuated in DDR2-silenced (siRNA) or inhibited (WRG-28) cells (Figure 2C), establishing transcriptional regulation of fibronectin by DDR2-activated YAP.

### ***Functional significance of fibronectin expression in cardiac fibroblasts***

#### ***i) A role for fibronectin in Ang II-dependent cIAP2 expression and apoptosis resistance in cardiac fibroblasts exposed to oxidative stress***

Fibronectin has been reported to enhance cell survival in various cell types (11–14). Previous studies from our laboratory had demonstrated that Ang II enhances cIAP2 expression in cardiac fibroblasts that in turn protects these cells against ambient stress (7). In the present study, the role of fibronectin in the regulation of Ang II-dependent cIAP2 expression in cardiac fibroblasts was probed. Fibronectin knockdown using siRNA attenuated Ang II-stimulated cIAP2 expression (Figure 3A). Additionally, fibronectin knockdown enhanced apoptosis in cardiac fibroblasts exposed to 25  $\mu$ M H<sub>2</sub>O<sub>2</sub>, as indicated by decreased pro-caspase 3 and increased cleaved-caspase 3 levels (Figure 3B). Notably, loss of viability was associated with reduced cIAP2 levels in these cells (Figure 3B). The observations pointed to the role of fibronectin in enhancing cardiac fibroblast survival under conditions of oxidative stress.

### ***ii) Fibronectin mediates Ang II-dependent increase in collagen type I expression***

Since fibronectin has been implicated in hepatic and pulmonary fibrosis (15–18), and global induced-ablation of fibronectin (19) and fibroblast-specific inducible ablation of fibronectin in adult mice post-injury resulted in significant cardio-protection with reduced hypertrophy and fibrosis (4, 19), the possible role of fibronectin in collagen type I expression in cardiac fibroblasts was probed. Significant attenuation of Ang II-stimulated collagen type I expression (Figure 3C) upon RNA interference-mediated knockdown of fibronectin suggested a role for fibronectin in the regulation of collagen expression in cardiac fibroblasts.

### ***iii) Fibronectin mediates Ang II-stimulated AT1 receptor expression in cardiac fibroblasts***

Previous studies from our laboratory had demonstrated that Ang II acts via the AT1 receptor (AT1R) to enhance cIAP2 and collagen type I expression in cardiac fibroblasts (7, 20, 21). Therefore, we checked whether fibronectin plays a role in AT1R expression in Ang II-treated cardiac fibroblasts. Interestingly, fibronectin knockdown down-regulated both basal and Ang II-stimulated AT1R expression (Figure 3D), clearly indicating that fibronectin mediates the expression of AT1R in cardiac fibroblasts.

### ***Fibronectin regulates Ang II-mediated AT1R expression through Integrin- $\beta$ 1/Integrin-linked kinase signaling pathway***

Fibronectin is reported to act via integrin  $\alpha$ 5 $\beta$ 1 (22), and inhibition of the  $\beta$ 1 subunit, the partially-conserved catalytic subunit of integrins (23–25), rather than the  $\alpha$ 5 subunit, has a more pronounced inhibitory effect on the binding and assembly of exogenous fibronectin (22, 26). In the present study, we observed that fibronectin siRNA attenuates Integrin- $\beta$ 1 expression in Ang II-treated cardiac fibroblasts (Figure 4A), suggesting that fibronectin has an obligate role in the regulation of its receptor. The effect of knockdown of Integrin- $\beta$ 1 and Integrin-linked kinase (ILK), a proximal effector of Integrin- $\beta$ 1 (27), on AT1R was probed next. Abrogation of Integrin- $\beta$ 1 signalling using Integrin- $\beta$ 1 or ILK siRNA led to attenuation of AT1R expression in Ang II-stimulated cardiac fibroblasts (Figure 4B-C). Notably, over-expression of Integrin- $\beta$ 1 in fibronectin-silenced cells partially restored the expression of cIAP2, collagen type I and AT1R in Ang II-treated



cells (Figure 4D), clearly demonstrating the involvement of fibronectin-dependent Integrin- $\beta$ 1 signalling in the regulation of cIAP2, collagen type I and AT1R expression in cardiac fibroblasts.

### ***DDR2 knockdown attenuates Ang II-stimulated expression of AT1R in cardiac fibroblasts***

Since fibronectin expression is dependent on DDR2, we investigated the effect of DDR2 knockdown on Ang II-stimulated AT1R expression. siRNA-mediated DDR2 silencing reduced both basal and Ang II-stimulated AT1R expression (Figure 5A). To determine whether DDR2 regulates AT1R expression independently or in conjunction with fibronectin, the effect of fibronectin knockdown in cells constitutively expressing DDR2 was probed. Interestingly, DDR2 over-expression failed to restore AT1R in fibronectin-inhibited cells, showing that DDR2 regulates AT1R via fibronectin (Figure 5B).

A schematic representation of the molecular events that link ECM and Ang II signalling pathways in cardiac fibroblasts is provided in Figure 6.

## **Discussion**

Regardless of etiology, most myocardial diseases are associated with interstitial fibrosis due to excessive deposition of ECM proteins by cardiac fibroblasts and consequent impairment of the structural and functional integrity of the heart. Despite the centrality of interstitial fibrosis in heart disease and increasing appreciation that therapy directed at cardiac fibrosis may retard heart failure, there are limited therapeutic options to effectively target cardiac fibroblasts and attenuate cardiac fibrosis. Blocking the actions of Ang II either with AT1R blockers or ACE inhibitors is an accepted treatment strategy to reduce adverse cardiac remodelling following myocardial infarction but it may entail unfavourable effects such as the paradoxical activation of a negative feedback loop within the Renin-Angiotensin cascade, leading to elevation of systemic Ang II (28–30). Identification of alternate therapeutic targets would hinge around a sound understanding of the molecular basis of cardiac fibrogenesis.

In this regard, the critical role of ECM in myocardial pathophysiology, particularly in the pathogenesis of heart failure, has attracted increasing attention in recent years. ECM proteins significantly impact cellular responses, cell migration, differentiation, proliferation

and survival through their ability to bind to multiple interacting partners, including other ECM proteins, and transmission of growth factor signals (31, 32). Alterations in ECM are reported to play an important role in modulating fibroblast phenotype and function (33). Major ECM proteins, collagen and fibronectin, and their receptors, DDR2 and integrins, participate in signalling events and determine cell fate (34). Our previous studies had shown that collagen type I-activated DDR2 is a 'master switch' in cardiac fibroblasts with an obligate role in phenotypic transformation, proliferation, collagen expression and apoptosis resistance in cardiac fibroblasts (2, 6, 7).

Fibronectin is a high molecular weight glycoprotein constituent of ECM that interacts with several matrix and cell surface proteins to regulate cell adhesion, migration, metastasis, proliferation and differentiation, as well as embryogenesis, wound healing, and blood coagulation (3). It has also been reported that tissue fibrosis is associated with up-regulation of fibronectin (15–18). In the present study, Ang II was found to enhance fibronectin expression (Figure 1A). Though Ang II per se has not been shown to enhance fibronectin, our observation is consistent with scleraxis-mediated enhancement of fibronectin gene expression in cardiac fibroblasts by TGF- $\beta$ 1 (35) since it is known that Ang II exerts some of its effects via TGF- $\beta$  signalling in these cells (36).

We had shown previously that Ang II acts via the AT1 receptor and the GPCR pathway to enhance DDR2 expression that in turn plays an indispensable role in collagen type I gene expression (2). The findings reported here indicate that DDR2 mediates Ang II-stimulated expression of not only collagen type I but also of fibronectin (Figure 1B-C), which underscores its critical role in ECM homeostasis and ECM signalling. Further, our data also show transcriptional up-regulation of fibronectin by DDR2-dependent activation of YAP (Figure 2), which is a mechano-sensitive transcriptional co-activator (37). The observation is consistent with previous studies that implicate transcriptional activation of YAP in pro-fibrotic gene expression in fibroblasts (37). Moreover, while a previous study from our laboratory had implicated Ang II-dependent activation of YAP in collagen type I expression (6), inhibition of YAP is reported to attenuate cardiac fibrosis (38).

It was of obvious interest to explore the pathophysiological significance of augmented fibronectin expression in cardiac fibroblasts. Cardiac fibroblasts are relatively resistant to several death signals that prevail in the injured myocardium, which enables these cells to

play a central role in tissue repair following myocyte loss but also facilitates their persistence in the infarct scar, resulting in disproportionate stromal growth and pump dysfunction (1, 39). While a role for constitutively-expressed Bcl-2 in the resistance of cardiac fibroblasts to a variety of pro-apoptotic stimuli was reported by Mayorga et al (40), our recent studies show that anti-apoptotic cIAP2, induced by Ang II via a DDR2- and Serum Response Factor-mediated mechanism, protects cardiac fibroblasts from ambient stress (7). The present study extends these earlier observations and points to a role for fibronectin, downstream of DDR2, in Ang II-stimulated cIAP2 expression (Figure 3A) and protection of the cells from oxidative damage (Figure 3B). In a recent study by Valiente-Alandi et al, no significant change in fibroblast survival was observed upon inhibition of fibronectin polymerization under basal conditions (4). It is possible that fibronectin is important for survival under stress conditions, as observed by us.

Collagen type I is the most abundant ECM protein in the heart and is a major constituent of the scar tissue formed following injury (41). Excessive collagen deposition leads to diminished ventricular compliance that contributes to the initiation and progression of heart failure. Regulation of collagen expression has understandably been a subject of intense investigation for a long time. The findings presented here show that, apart from a role in cIAP2 expression, fibronectin has a role in collagen type I expression in Ang II-treated cells (Figure 3C), consistent with what was observed by Valiente-Alandi et al in an ischemia-reperfusion injury model (4).

Probing the regulatory role of fibronectin further, we found that its knockdown attenuates the expression of not only cIAP2 and collagen type I but also of Integrin- $\beta$ 1 (Figure 4A), which is known to be importantly involved in transducing ECM signalling (42). Thus, apart from acting as a ligand to trigger Integrin- $\beta$ 1 signalling, fibronectin also regulates Integrin- $\beta$ 1 gene expression in Ang II-stimulated cardiac fibroblasts. Further, plasmid-mediated over-expression of Integrin- $\beta$ 1 in cells following fibronectin knockdown restores, at least in part, the expression of cIAP2 and collagen type I (Figure 4D). Together, the data indicate that fibronectin positively regulates Integrin- $\beta$ 1 that in turn regulates cIAP2 and collagen type I in response to Ang II. The observed effect of Integrin- $\beta$ 1 over-expression in fibronectin-silenced cells suggests that fibronectin may not be indispensable as a ligand for Integrin- $\beta$ 1 signalling, and that other ligands such as collagen may also trigger Integrin- $\beta$ 1 signalling. Our earlier studies had shown that a cross-talk between the two

major collagen receptors, DDR2 and Integrin- $\beta$ 1, is a critical determinant of  $\alpha$ -SMA-dependent collagen expression in Ang II-stimulated cardiac fibroblasts (6). Moreover, cell survival through ECM-integrin interactions has long been recognized (43). In light of the data presented here, it appears that fibronectin acts downstream of DDR2 to regulate Integrin- $\beta$ 1 signalling-dependent gene expression in cardiac fibroblasts. Our findings on the role of Integrin- $\beta$ 1 as an 'effector molecule' in a complex regulatory cascade are in line with an earlier report that ECM-mediated mechanical stress activates TGF- $\beta$  and triggers expression of Integrin and pro-fibrotic gene program in cardiac fibroblasts (44).

We also examined the mechanistic basis of fibronectin-mediated apoptosis resistance and collagen expression in Ang II-stimulated cardiac fibroblasts. It is known that Ang II, the effector molecule of the renin-angiotensin system, acts via the AT1 receptor to exert its potent pro-fibrotic effects on cardiac fibroblasts, which makes Ang II-AT1 signalling a major regulator of cardiac fibroblast response to myocardial injury, and hence a determinant of structural and functional alterations in the injured heart (45). We had previously uncovered a complex mechanism of regulation of AT1R involving the redox-sensitive NF- $\kappa$ B and AP-1 transcription factors that are activated by the co-ordinated action of ERK1/2 MAPK, p38 MAPK and JNK in cardiac fibroblasts exposed to oxidative stress (21). Interestingly, Ang II produced endogenously in response to oxidative response was found to be responsible for increased AT1R expression (21). Here we present the novel finding that fibronectin has an obligate role in the regulation of the AT1 receptor in Ang II-stimulated cells (Figure 3D). Interestingly, while knockdown of Integrin- $\beta$ 1 or integrin-linked kinase attenuated Ang II-stimulated AT1R expression, over-expression of Integrin- $\beta$ 1 in fibronectin-silenced cells partially restored AT1R expression (Figure 4D), showing that Integrin- $\beta$ 1 signalling underlies the regulatory role of fibronectin in enhanced AT1R expression in Ang II-stimulated cardiac fibroblasts. By demonstrating the role of an ECM protein like fibronectin in AT1R expression, the present study points to a convergence of ECM signalling and Ang II signalling and unravels a novel mechanism by which ECM can impact cardiac fibroblast function.

Considered in tandem, our findings indicate the existence of a complex mechanism of regulation of cardiac fibroblast function involving two major ECM proteins, collagen type I and fibronectin, and their receptors, DDR2 and Integrin- $\beta$ 1. Future investigations should evaluate the possible role of other factors like periostin within this complex mechanistic

framework of molecular events under the regulatory control of DDR2 in cardiac fibroblasts.

Lastly, as noted earlier, targeting ECM proteins could offer alternate therapeutic strategies to prevent or minimise adverse cardiac remodelling in pathological states. In this regard, it is significant that fibronectin inhibition is reported to exert cardioprotective effect through a significant reduction in cardiac fibrosis and adverse fibrotic remodelling in an ischemia/reperfusion injury model (42). Viewed in tandem with these earlier observations in an in vivo model of myocardial injury, our findings support the postulation that increased susceptibility of cardiac fibroblasts to apoptosis and prevention of excessive collagen deposition may, in part, explain the cardioprotective effect of fibronectin inhibition observed in the animal model. Based on their findings, Valiente-Alandi et al suggest that targeting fibronectin polymerization may be a new therapeutic strategy for treating cardiac fibrosis and heart failure. However, given the ubiquitous distribution and critical role of fibronectin and Integrin- $\beta$ 1 in the heart, targeting them may entail global consequences, compromising cardiac integrity and function. On the contrary, since fibronectin and Integrin- $\beta$ 1 are under the regulatory control of DDR2, it is logical to postulate that the predominant localization and regulatory role of DDR2 in cardiac fibroblasts mark it as a cardiac fibroblast-specific drug target to control cardiac fibrosis.

### **Acknowledgements**

This work was supported by a Research Grant (BT/PR23486/BRB/10/1589/2017) to SK from the Department of Biotechnology, Government of India, and Research Fellowships from SCTIMST, Trivandrum, to AST and the Department of Biotechnology, Government of India, to HV. The source of funding for WM and EGL was the Intramural Research Program of the National Institute on Aging, National Institutes of Health. SK, AST and HV thank Dr Ajay Kumar R of the Rajiv Gandhi Centre for Biotechnology, Trivandrum, for providing access to the Bioruptor Facility and acknowledge the facilities provided by SCTIMST, Trivandrum.

## References:

1. **Humeres C, Frangogiannis NG.** Fibroblasts in the Infarcted, Remodeling, and Failing Heart. *JACC Basic Transl Sci* 4: 449–467, 2019. doi: 10.1016/j.jacbts.2019.02.006.
2. **George M, Vijayakumar A, Dhanesh SB, James J, Shivakumar K.** Molecular basis and functional significance of Angiotensin II-induced increase in Discoidin Domain Receptor 2 gene expression in cardiac fibroblasts. *J Mol Cell Cardiol* 90: 59–69, 2016. doi: 10.1016/j.yjmcc.2015.12.004.
3. **To WS, Midwood KS.** Plasma and cellular fibronectin: distinct and independent functions during tissue repair. *Fibrogenesis Tissue Repair* 4: 21, 2011. doi: 10.1186/1755-1536-4-21.
4. **Valiente-Alandi Iñigo, Potter Sarah J., Salvador Ane M., Schafer Allison E., Schips Tobias, Carrillo-Salinas Francisco, Gibson Aaron M., Nieman Michelle L., Perkins Charles, Sargent Michelle A., Huo Jiuzhou, Lorenz John N., DeFalco Tony, Molkentin Jeffery D., Alcaide Pilar, Blaxall Burns C.** Inhibiting Fibronectin Attenuates Fibrosis and Improves Cardiac Function in a Model of Heart Failure. *Circulation* 138: 1236–1252, 2018. doi: 10.1161/CIRCULATIONAHA.118.034609.
5. **Sopel MJ, Rosin NL, Lee TDG, Légaré J-F.** Myocardial fibrosis in response to Angiotensin II is preceded by the recruitment of mesenchymal progenitor cells. *Lab Invest J Tech Methods Pathol* 91: 565–578, 2011. doi: 10.1038/labinvest.2010.190.
6. **V H, Titus AS, Cowling RT, Kailasam S.** Collagen receptor cross-talk determines  $\alpha$ -smooth muscle actin-dependent collagen gene expression in angiotensin II-stimulated cardiac fibroblasts. *J Biol Chem* 294: 19723–19739, 2019. doi: 10.1074/jbc.RA119.009744.
7. **Titus AS, V H, Kailasam S.** Coordinated regulation of cell survival and cell cycle pathways by DDR2-dependent SRF transcription factor in cardiac fibroblasts. *Am J Physiol-Heart Circ Physiol* 318: H1538–H1558, 2020. doi: 10.1152/ajpheart.00740.2019.
8. **Young-Pearse TL, Bai J, Chang R, Zheng JB, LoTurco JJ, Selkoe DJ.** A Critical Function for  $\beta$ -Amyloid Precursor Protein in Neuronal Migration Revealed by in utero RNA Interference. *J Neurosci* 27: 14459, 2007. doi: 10.1523/JNEUROSCI.4701-07.2007.
9. **Kumaran C, Shivakumar K.** Calcium- and superoxide anion-mediated mitogenic action of substance P on cardiac fibroblasts. *Am J Physiol Heart Circ Physiol* 282: H1855-1862, 2002. doi: 10.1152/ajpheart.00747.2001.
10. **Grither WR, Longmore GD.** Inhibition of tumor–microenvironment interaction and tumor invasion by small-molecule allosteric inhibitor of DDR2 extracellular domain. *Proc Natl Acad Sci* 115: E7786–E7794, 2018. doi: 10.1073/pnas.1805020115.

11. **Zhang Z, Vuori K, Reed JC, Ruoslahti E.** The alpha 5 beta 1 integrin supports survival of cells on fibronectin and up-regulates Bcl-2 expression. *Proc Natl Acad Sci* 92: 6161, 1995. doi: 10.1073/pnas.92.13.6161.
12. **Globus RK, Doty SB, Lull JC, Holmuhamedov E, Humphries MJ, Damsky CH.** Fibronectin is a survival factor for differentiated osteoblasts. *J Cell Sci* 111: 1385, 1998.
13. **Anwar AR, Moqbel R, Walsh GM, Kay AB, Wardlaw AJ.** Adhesion to fibronectin prolongs eosinophil survival. *J Exp Med* 177: 839–843, 1993. doi: 10.1084/jem.177.3.839.
14. **Lin F, Ren X-D, Pan Z, Macri L, Zong W-X, Tonnesen MG, Rafailovich M, Barsagi D, Clark RAF.** Fibronectin Growth Factor-Binding Domains Are Required for Fibroblast Survival. *J Invest Dermatol* 131: 84–98, 2011. doi: 10.1038/jid.2010.253.
15. **Altrock E, Sens C, Wuerfel C, Vasel M, Kawelke N, Dooley S, Sottile J, Nakchbandi IA.** Inhibition of fibronectin deposition improves experimental liver fibrosis. *J Hepatol* 62: 625–633, 2015. doi: 10.1016/j.jhep.2014.06.010.
16. **Liu X, Liu R, Hou F, Cui L, Li C-Y, Chi C, Yi E, Wen Y, Yin C.** Fibronectin expression is critical for liver fibrogenesis in vivo and in vitro. *Mol Med Rep* 14: 3669–3675, 2016. doi: 10.3892/mmr.2016.5673.
17. **Hernnas J, Nettelbladt O, Bjermer L, Sarnstrand B, Malmstrom A, Hallgren R.** Alveolar accumulation of fibronectin and hyaluronan precedes bleomycin-induced pulmonary fibrosis in the rat. *Eur Respir J* 5: 404, 1992.
18. **Muro AF, Moretti FA, Moore BB, Yan M, Atrasz RG, Wilke CA, Flaherty KR, Martinez FJ, Tsui JL, Sheppard D, Baralle FE, Toews GB, White ES.** An Essential Role for Fibronectin Extra Type III Domain A in Pulmonary Fibrosis. *Am J Respir Crit Care Med* 177: 638–645, 2008. doi: 10.1164/rccm.200708-1291OC.
19. **Konstandin MH, Völkens M, Collins B, Quijada P, Quintana M, Torre A, Ormachea L, Din S, Gude N, Toko H, Sussman MA.** Fibronectin contributes to pathological cardiac hypertrophy but not physiological growth. *Basic Res Cardiol* 108: 375, 2013. doi: 10.1007/s00395-013-0375-8.
20. **Philip L, Shivakumar K.** cIAP-2 protects cardiac fibroblasts from oxidative damage: an obligate regulatory role for ERK1/2 MAPK and NF- $\kappa$ B. *J Mol Cell Cardiol* 62: 217–226, 2013. doi: 10.1016/j.yjmcc.2013.06.009.
21. **Anupama V, George M, Dhanesh SB, Chandran A, James J, Shivakumar K.** Molecular mechanisms in H<sub>2</sub>O<sub>2</sub>-induced increase in AT1 receptor gene expression in cardiac fibroblasts: A role for endogenously generated Angiotensin II. *J Mol Cell Cardiol* 97: 295–305, 2016. doi: 10.1016/j.yjmcc.2016.05.010.
22. **Fogerty FJ, Akiyama SK, Yamada KM, Mosher DF.** Inhibition of binding of fibronectin to matrix assembly sites by anti-integrin (alpha 5 beta 1) antibodies. *J Cell Biol* 111: 699–708, 1990. doi: 10.1083/jcb.111.2.699.

23. **Balzac F, Belkin AM, Koteliansky VE, Balabanov YV, Altruda F, Silengo L, Tarone G.** Expression and functional analysis of a cytoplasmic domain variant of the beta 1 integrin subunit. *J Cell Biol* 121: 171–178, 1993. doi: 10.1083/jcb.121.1.171.
24. **Reszka AA, Hayashi Y, Horwitz AF.** Identification of amino acid sequences in the integrin beta 1 cytoplasmic domain implicated in cytoskeletal association. *J Cell Biol* 117: 1321–1330, 1992. doi: 10.1083/jcb.117.6.1321.
25. **Sastry SK, Horwitz AF.** Integrin cytoplasmic domains: mediators of cytoskeletal linkages and extra- and intracellular initiated transmembrane signaling. *Curr Opin Cell Biol* 5: 819–831, 1993. doi: 10.1016/0955-0674(93)90031-K.
26. **Puzon-McLaughlin W, Yednock TA, Takada Y.** Regulation of Conformation and Ligand Binding Function of Integrin  $\alpha 5\beta 1$  by the  $\beta 1$  Cytoplasmic Domain\*. *J Biol Chem* 271: 16580–16585, 1996. doi: 10.1074/jbc.271.28.16580.
27. **Dedhar S, Williams B, Hannigan G.** Integrin-linked kinase (ILK): a regulator of integrin and growth-factor signalling. *Trends Cell Biol* 9: 319–323, 1999. doi: 10.1016/S0962-8924(99)01612-8.
28. **Nobakht N, Kamgar M, Rastogi A, Schrier RW.** Limitations of angiotensin inhibition. *Nat Rev Nephrol* 7: 356–359, 2011. doi: 10.1038/nrneph.2011.29.
29. **Wolf G, Ritz E.** Combination therapy with ACE inhibitors and angiotensin II receptor blockers to halt progression of chronic renal disease: Pathophysiology and indications. *Kidney Int* 67: 799–812, 2005. doi: 10.1111/j.1523-1755.2005.00145.x.
30. **Baltatzi M, Savopoulos C, Hatzitolios A.** Role of angiotensin converting enzyme inhibitors and angiotensin receptor blockers in hypertension of chronic kidney disease and renoprotection. Study results. *Hippokratia* 15: 27–32, 2011.
31. **Hastings JF, Skhinas JN, Fey D, Croucher DR, Cox TR.** The extracellular matrix as a key regulator of intracellular signalling networks. *Br J Pharmacol* 176: 82–92, 2019. doi: 10.1111/bph.14195.
32. **Dwi Liliek Kusindarta.** The Role of Extracellular Matrix in Tissue Regeneration. In: *Tissue Regeneration*, edited by Hevi Wihadmadyatami ED1 - Hussein Abdel hay El-Sayed Kaoud. IntechOpen, p. Ch. 5.
33. **Dobaczewski M, de Haan JJ, Frangogiannis NG.** The extracellular matrix modulates fibroblast phenotype and function in the infarcted myocardium. *J Cardiovasc Transl Res* 5: 837–847, 2012. doi: 10.1007/s12265-012-9406-3.
34. **Sainio A, Järveläinen H.** Extracellular matrix-cell interactions: Focus on therapeutic applications. *Cell Signal* 66: 109487, 2020. doi: 10.1016/j.cellsig.2019.109487.
35. **Bagchi RA, Lin J, Wang R, Czubyrt MP.** Regulation of fibronectin gene expression in cardiac fibroblasts by scleraxis. *Cell Tissue Res* 366: 381–391, 2016. doi: 10.1007/s00441-016-2439-1.



36. **Ehanire T, Ren L, Bond J, Medina M, Li G, Bashirov L, Chen L, Kokosis G, Ibrahim M, Selim A, Blobe GC, Levinson H.** Angiotensin II stimulates canonical TGF- $\beta$  signaling pathway through angiotensin type 1 receptor to induce granulation tissue contraction. *J Mol Med Berl Ger* 93: 289–302, 2015. doi: 10.1007/s00109-014-1211-9.
37. **Liu F, Lagares D, Choi KM, Stopfer L, Marinković A, Vrbanac V, Probst CK, Hiemer SE, Sisson TH, Horowitz JC, Rosas IO, Fredenburgh LE, Feghali-Bostwick C, Varelas X, Tager AM, Tschumperlin DJ.** Mechanosignaling through YAP and TAZ drives fibroblast activation and fibrosis. *Am J Physiol-Lung Cell Mol Physiol* 308: L344–L357, 2014. doi: 10.1152/ajplung.00300.2014.
38. **Francisco J, Zhang Y, Jeong JI, Mizushima W, Ikeda S, Ivessa A, Oka S, Zhai P, Tallquist MD, Del Re DP.** Blockade of Fibroblast YAP Attenuates Cardiac Fibrosis and Dysfunction Through MRTF-A Inhibition. *JACC Basic Transl Sci* 5: 931–945, 2020. doi: 10.1016/j.jacbts.2020.07.009.
39. **Furtado MB, Nim HT, Boyd SE, Rosenthal NA.** View from the heart: cardiac fibroblasts in development, scarring and regeneration. *Development* 143: 387–397, 2016. doi: 10.1242/dev.120576.
40. **Mayorga M, Bahi N, Ballester M, Comella JX, Sanchis D.** Bcl-2 Is a Key Factor for Cardiac Fibroblast Resistance to Programmed Cell Death. *J Biol Chem* 279: 34882–34889, 2004. doi: 10.1074/jbc.M404616200.
41. **Weber KT.** Cardiac interstitium in health and disease: the fibrillar collagen network. *J Am Coll Cardiol* 13: 1637–1652, 1989. doi: 10.1016/0735-1097(89)90360-4.
42. **Humphries JD, Chastney MR, Askari JA, Humphries MJ.** Signal transduction via integrin adhesion complexes. *Curr Opin Cell Biol* 56: 14–21, 2019. doi: 10.1016/j.ceb.2018.08.004.
43. **Kadry YA, Calderwood DA.** Chapter 22: Structural and signaling functions of integrins. *Biochim Biophys Acta Biomembr* 1862: 183206, 2020. doi: 10.1016/j.bbamem.2020.183206.
44. **Margadant C, Sonnenberg A.** Integrin–TGF- $\beta$  crosstalk in fibrosis, cancer and wound healing. *EMBO Rep* 11: 97–105, 2010. doi: 10.1038/embor.2009.276.
45. **Hunyady L, Catt KJ.** Pleiotropic AT1 Receptor Signaling Pathways Mediating Physiological and Pathogenic Actions of Angiotensin II. *Mol Endocrinol* 20: 953–970, 2006. doi: 10.1210/me.2004-0536.

## Figure legends:

### Figure 1:

#### **DDR2 mediates Ang II-dependent fibronectin expression in cardiac fibroblasts.**

**(A)** Sub-confluent quiescent cultures of cardiac fibroblasts were stimulated with Angiotensin II (Ang II) (1 $\mu$ M). Protein was isolated at 12 h of Ang II treatment and subjected to western blot analysis for detection of fibronectin and DDR2, with  $\beta$ -actin as loading control. \* $p$ < 0.05 and \*\* $p$ <0.01 vs. control. **(B)** RNAi-mediated silencing of DDR2 confirmed its role in regulating fibronectin gene expression in Ang II-stimulated cardiac fibroblasts. Cardiac fibroblasts were transiently transfected with DDR2 siRNA (5 pmol) or control (scrambled) siRNA prior to treatment with Ang II for 12 h. Fibronectin protein expression was examined, with  $\beta$ -actin as loading control. Validation of DDR2 silencing is also shown. \* $p$ <0.05, \*\*  $p$ < 0.01 (comparisons as depicted in the Figure). **(C)** Cardiac fibroblasts were treated with WRG-28 (2  $\mu$ M) for 1 h prior to Ang II treatment. Cells were collected at 12 h post-Ang II treatment and fibronectin protein levels were examined, with  $\beta$ -actin as loading control. \* $p$ < 0.05 and \*\* $p$ <0.01 vs. control. **(D)** Cardiac fibroblasts were transfected with DDR2 cDNA over-expression plasmid (DDR2OE) (with empty vector control, Control OE), post-revival, the cells were serum-deprived for 36 h. Cells were collected and fibronectin protein expression was examined, with  $\beta$ -actin as loading control. \*\*  $p$ < 0.01 (comparisons as depicted in the Figure). Validation of DDR2 over-expression is also shown. Data are representative of 3 independent experiments,  $n$ =3. Mean  $\pm$  SEM (Standard Error of Mean).

#### **Figure 2: Transcriptional regulation of fibronectin by DDR2-activated YAP transcription coactivator**

**(A)** Cardiac fibroblasts were treated with Verteporfin (10  $\mu$ M) for 1 h prior to Ang II treatment. Cells were collected at 12 h post-Ang II treatment and fibronectin protein levels were examined, with  $\beta$ -actin as loading control. \*\* $p$ <0.01 vs. control (comparisons as depicted in the Figure). **(B)** RNAi-mediated silencing of YAP confirmed its role in regulating fibronectin gene expression in Ang II-stimulated cardiac fibroblasts. Cardiac fibroblasts were transiently transfected with YAP siRNA (10pmol) or control (scrambled) siRNA prior to treatment with Ang II for 12 h. Fibronectin protein expression was examined, with  $\beta$ -actin as loading control. Validation of DDR2 silencing is also shown. \*\*

$p < 0.01$  (comparisons as depicted in the Figure). **(C)** Sub-confluent quiescent cultures of cardiac fibroblasts were transiently transfected with YAP siRNA (10 pmol) or control (scrambled) siRNA prior to treatment with Ang II (1 $\mu$ M) and another set of cells were pre-treated with WRG-28 for an hour. Cells were collected at 30 mins post-Ang II treatment and chromatin was immunoprecipitated by anti-YAP antibody followed by PCR amplification and analysed on a 2% agarose gel for presence of 150bp region of fibronectin gene promoter containing the TEAD consensus binding site.

**Figure 3: Fibronectin mediates Ang II-stimulated expression of cIAP2, collagen type-I and AT1R in cardiac fibroblasts**

**(A)** RNAi-mediated silencing of fibronectin confirmed its role in regulating cIAP2 gene expression in Ang II-stimulated cardiac fibroblasts. Cardiac fibroblasts were transiently transfected with fibronectin siRNA (20 pmol) or control (scrambled) siRNA prior to treatment with Ang II for 12 h. cIAP2 protein expression was examined, with  $\beta$ -actin as loading control. Validation of fibronectin silencing is also shown. \* $p < 0.05$  and \*\*  $p < 0.01$  (comparisons as depicted in the Figure). **(B)** Cardiac fibroblasts were transiently transfected with fibronectin siRNA (20pmol) or control (scrambled) siRNA. Post-treatment of cells with 25 $\mu$ M H<sub>2</sub>O<sub>2</sub>, cells were collected at 3h and levels of procaspase 3 and cleaved-caspase 3 were examined, with  $\beta$ -actin as loading control. Validation of fibronectin silencing and associated change in cIAP2 level is also shown. \*\*  $p < 0.01$  (comparisons as depicted in the Figure). **(C-D)** Cardiac fibroblasts were transiently transfected with fibronectin siRNA (20 pmol) or control (scrambled) siRNA prior to treatment with Ang II for 12 h. **(C)** Collagen type 1 protein expression was examined, with  $\beta$ -actin as loading control. Validation of fibronectin silencing is also shown. \* $p < 0.05$  and \*\*  $p < 0.01$  (comparisons as depicted in the Figure). **(D)** AT1R protein expression was examined, with  $\beta$ -actin as loading control. Validation of fibronectin silencing is also shown. \* $p < 0.05$  and \*\*  $p < 0.01$  (comparisons as depicted in the Figure). Data are representative of 3 independent experiments,  $n=3$ . Mean  $\pm$  SEM (Standard Error of Mean).

#### **Figure 4: Fibronectin regulates Ang II-mediated AT1R expression through Integrin $\beta$ 1/Integrin-linked kinase signalling pathway**

(A) Cardiac fibroblasts were transiently transfected with FN siRNA (20 pmol) or control (scrambled) siRNA prior to treatment with Ang II for 12 h. Integrin- $\beta$ 1 protein expression was examined, with  $\beta$ -actin as loading control. \*\*  $p < 0.01$  (comparisons as depicted in the Figure). (B) RNAi-mediated silencing of Integrin- $\beta$ 1 (ITGB1) confirmed its role in regulating AT1R expression in Ang II-stimulated cardiac fibroblasts. Cardiac fibroblasts were transiently transfected with ITGB1 siRNA (5 pmol) or control (scrambled) siRNA prior to treatment with Ang II for 12 h. AT1R protein expression was examined, with  $\beta$ -actin as loading control. Validation of Integrin- $\beta$ 1 silencing is also shown. \*\*  $p < 0.01$  (comparisons as depicted in the Figure). (C) RNAi-mediated silencing of Integrin-linked Kinase (ILK) confirmed its role in regulating AT1R gene expression in Ang II-stimulated cardiac fibroblasts. Cardiac fibroblasts were transiently transfected with ILK siRNA (5 pmol) or control (scrambled) siRNA prior to treatment with Ang II for 12 h. AT1R protein expression was examined, with  $\beta$ -actin as loading control. \*\*  $p < 0.01$  (comparisons as depicted in the Figure). (D) Over-expression of Integrin- $\beta$ 1 in fibronectin-silenced cardiac fibroblasts shows partial rescue of cIAP2, Collagen type 1 and AT1R protein levels. Cardiac fibroblasts were co-transfected with fibronectin siRNA (10 pmol) and Integrin- $\beta$ 1 cDNA over-expression plasmid (2  $\mu$ g). Following transfection cells were revived in 10% FCS containing fibroblast growth medium for 12 h. Post-revival cells were serum-deprived for 24 h prior to treatment with Ang II for 12 h. Cells were collected and protein levels of AT1R, cIAP2 and collagen type 1 were examined, with  $\beta$ -actin as loading control. \* $p < 0.05$  and \*\*  $p < 0.01$  (comparisons as depicted in the Figure). Validation of fibronectin knockdown and Integrin- $\beta$ 1 over-expression is also shown. Data are representative of 3 independent experiments,  $n = 3$ . Mean  $\pm$  SEM (Standard Error of Mean).

#### **Figure 5: DDR2 regulates Ang II-mediated expression of AT1R in cardiac fibroblasts**

(A) RNAi-mediated silencing of DDR2 confirmed its role in regulating AT1R expression in Ang II-stimulated cardiac fibroblasts. Cardiac fibroblasts were transiently transfected with DDR2 siRNA (5 pmol) or control (scrambled) siRNA prior to treatment with Ang II for 12 h. AT1R protein expression was examined, with  $\beta$ -actin as loading control. Validation of DDR2 silencing is also shown. \* $p < 0.05$ , \*\*  $p < 0.01$  (comparisons as depicted in the

Figure). **(B)** Over-expression of DDR2 in fibronectin-silenced cardiac fibroblasts does not rescue AT1R protein levels. Cardiac fibroblasts were co-transfected with fibronectin siRNA (10 pmol) and DDR2 cDNA over-expression plasmid (2 $\mu$ g). Following transfection cells were revived in 10% FCS containing fibroblast growth medium for 12 h. Post-revival cells were serum-deprived for 24 h prior to treatment with Ang II for 12h. Cells were collected and protein levels of AT1R was examined, with  $\beta$ -actin as loading control. \* $p < 0.05$  and \*\* $p < 0.01$  (comparisons as depicted in the Figure). Validation of fibronectin knockdown and DDR2 over-expression is also shown. Data are representative of 3 independent experiments,  $n=3$ . Mean  $\pm$  SEM (Standard Error of Mean).

**Figure 1:**

# DDR2 mediates Ang II-stimulated fibronectin expression in cardiac fibroblasts

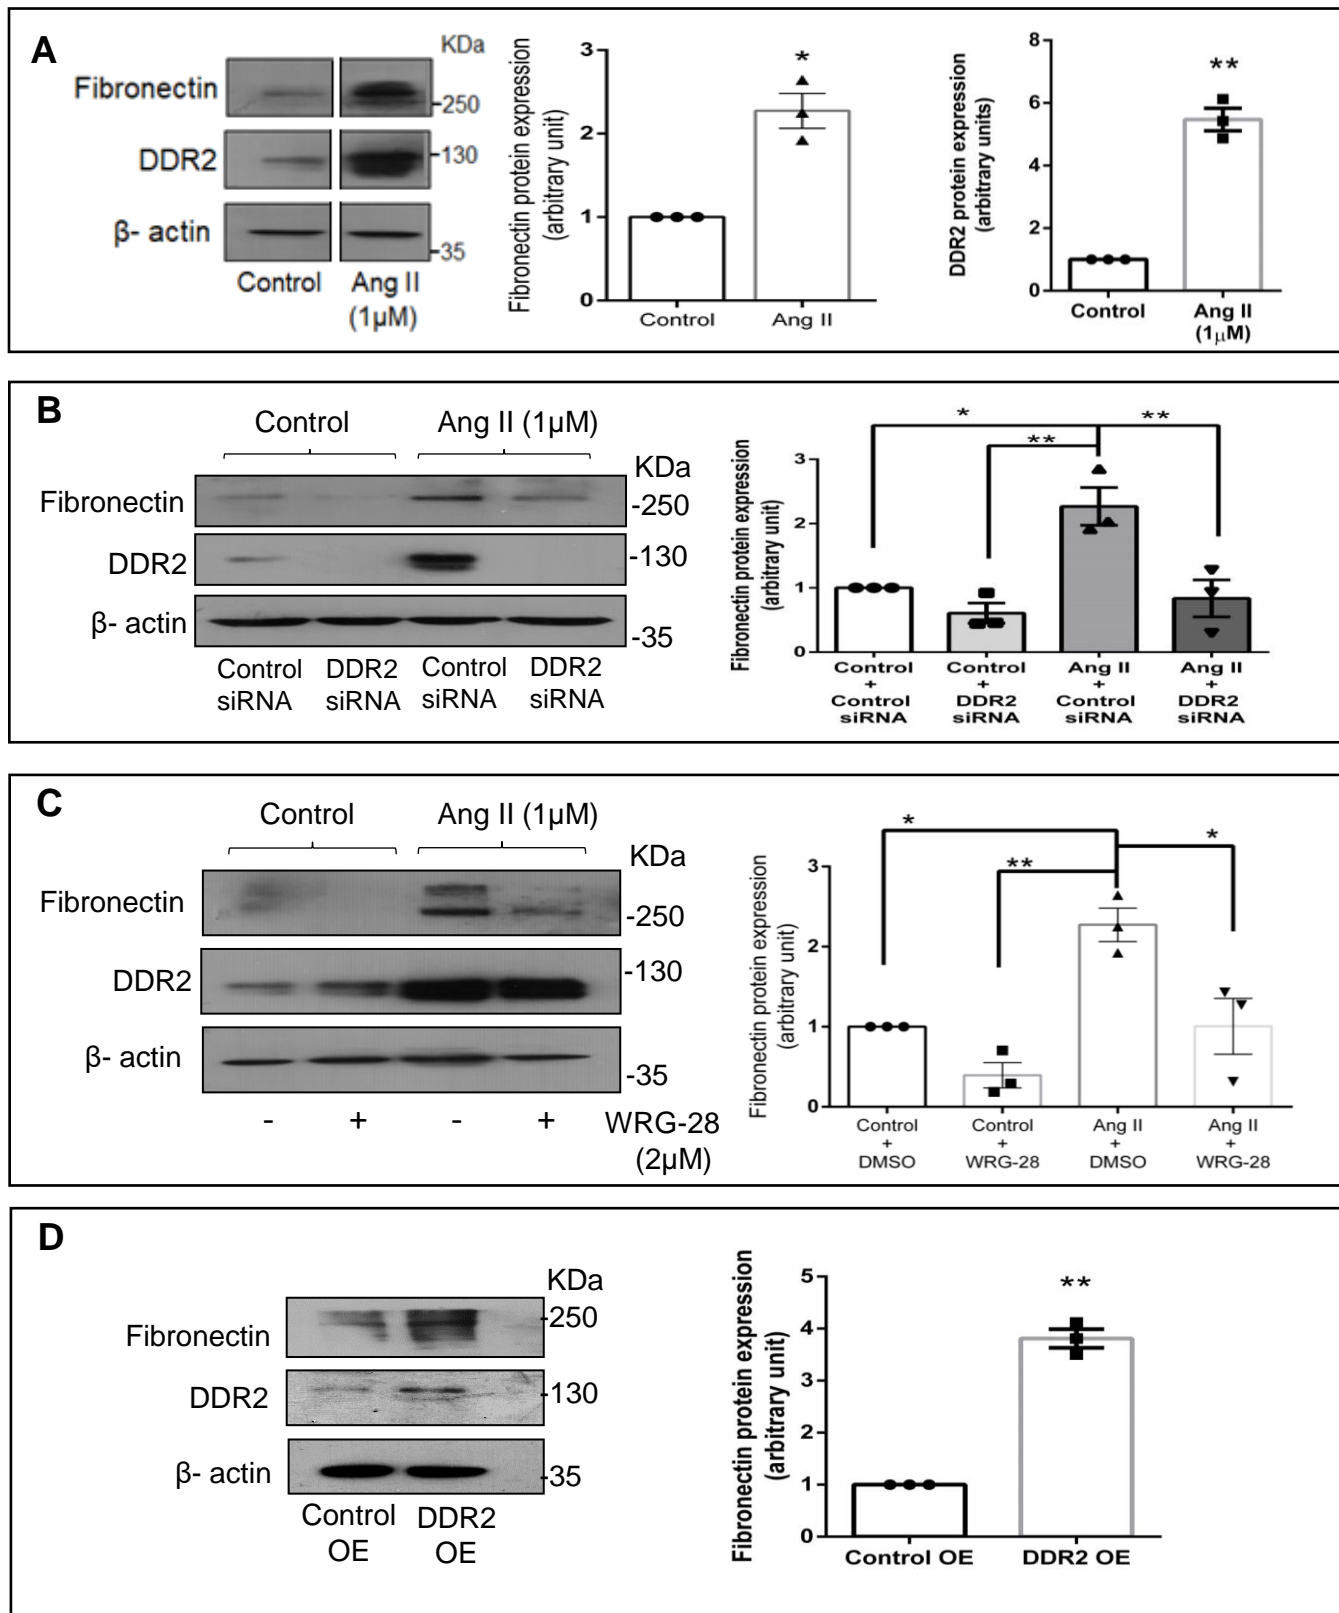



**Figure 3:**

# Fibronectin mediates Ang II-stimulated expression of cIAP2, collagen type-I and AT1R in cardiac fibroblasts

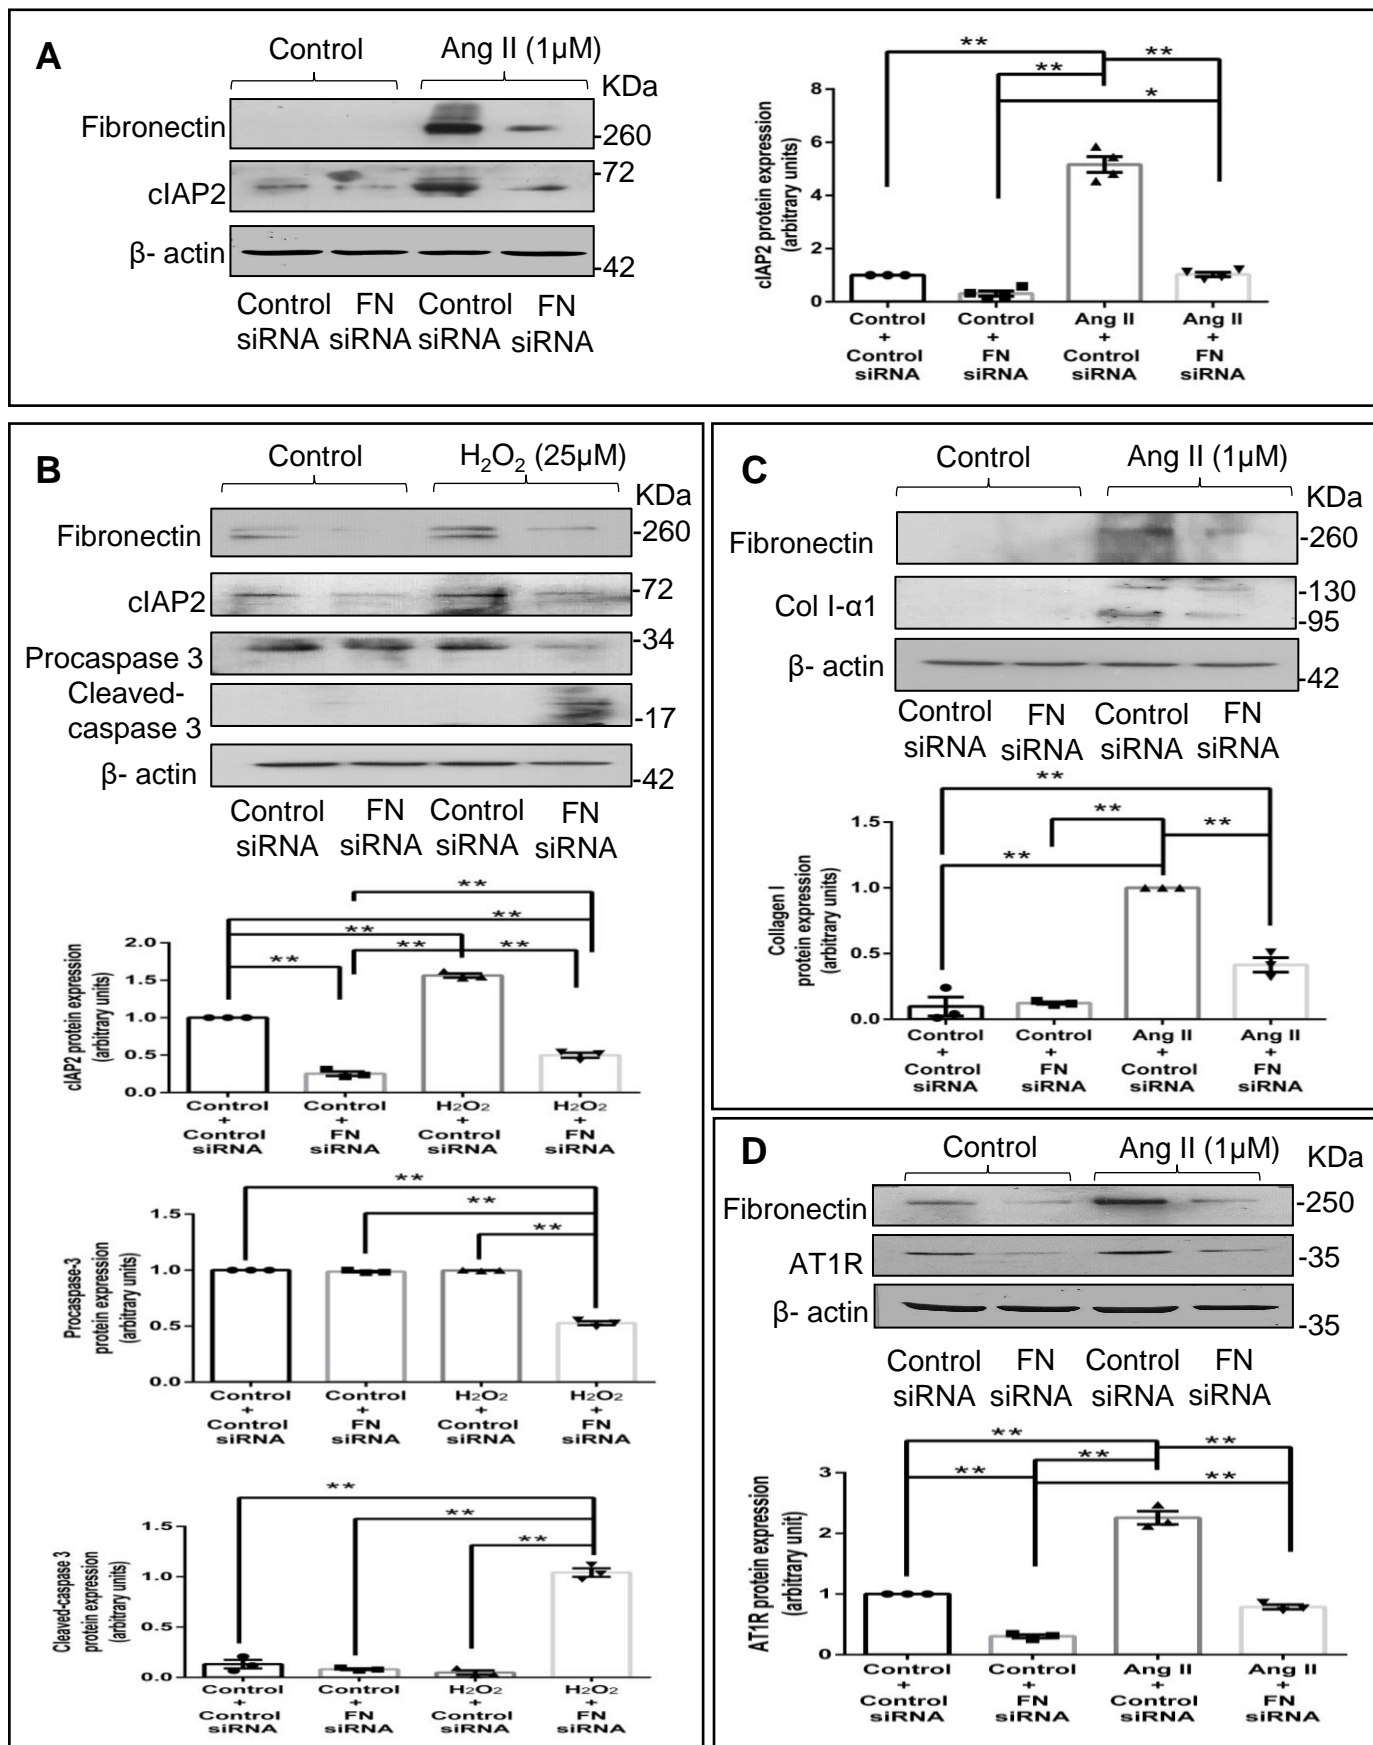



# Figure 4:

## Fibronectin regulates Ang II-stimulated AT1R expression through Integrin $\beta 1$ /Integrin-linked kinase signaling pathway

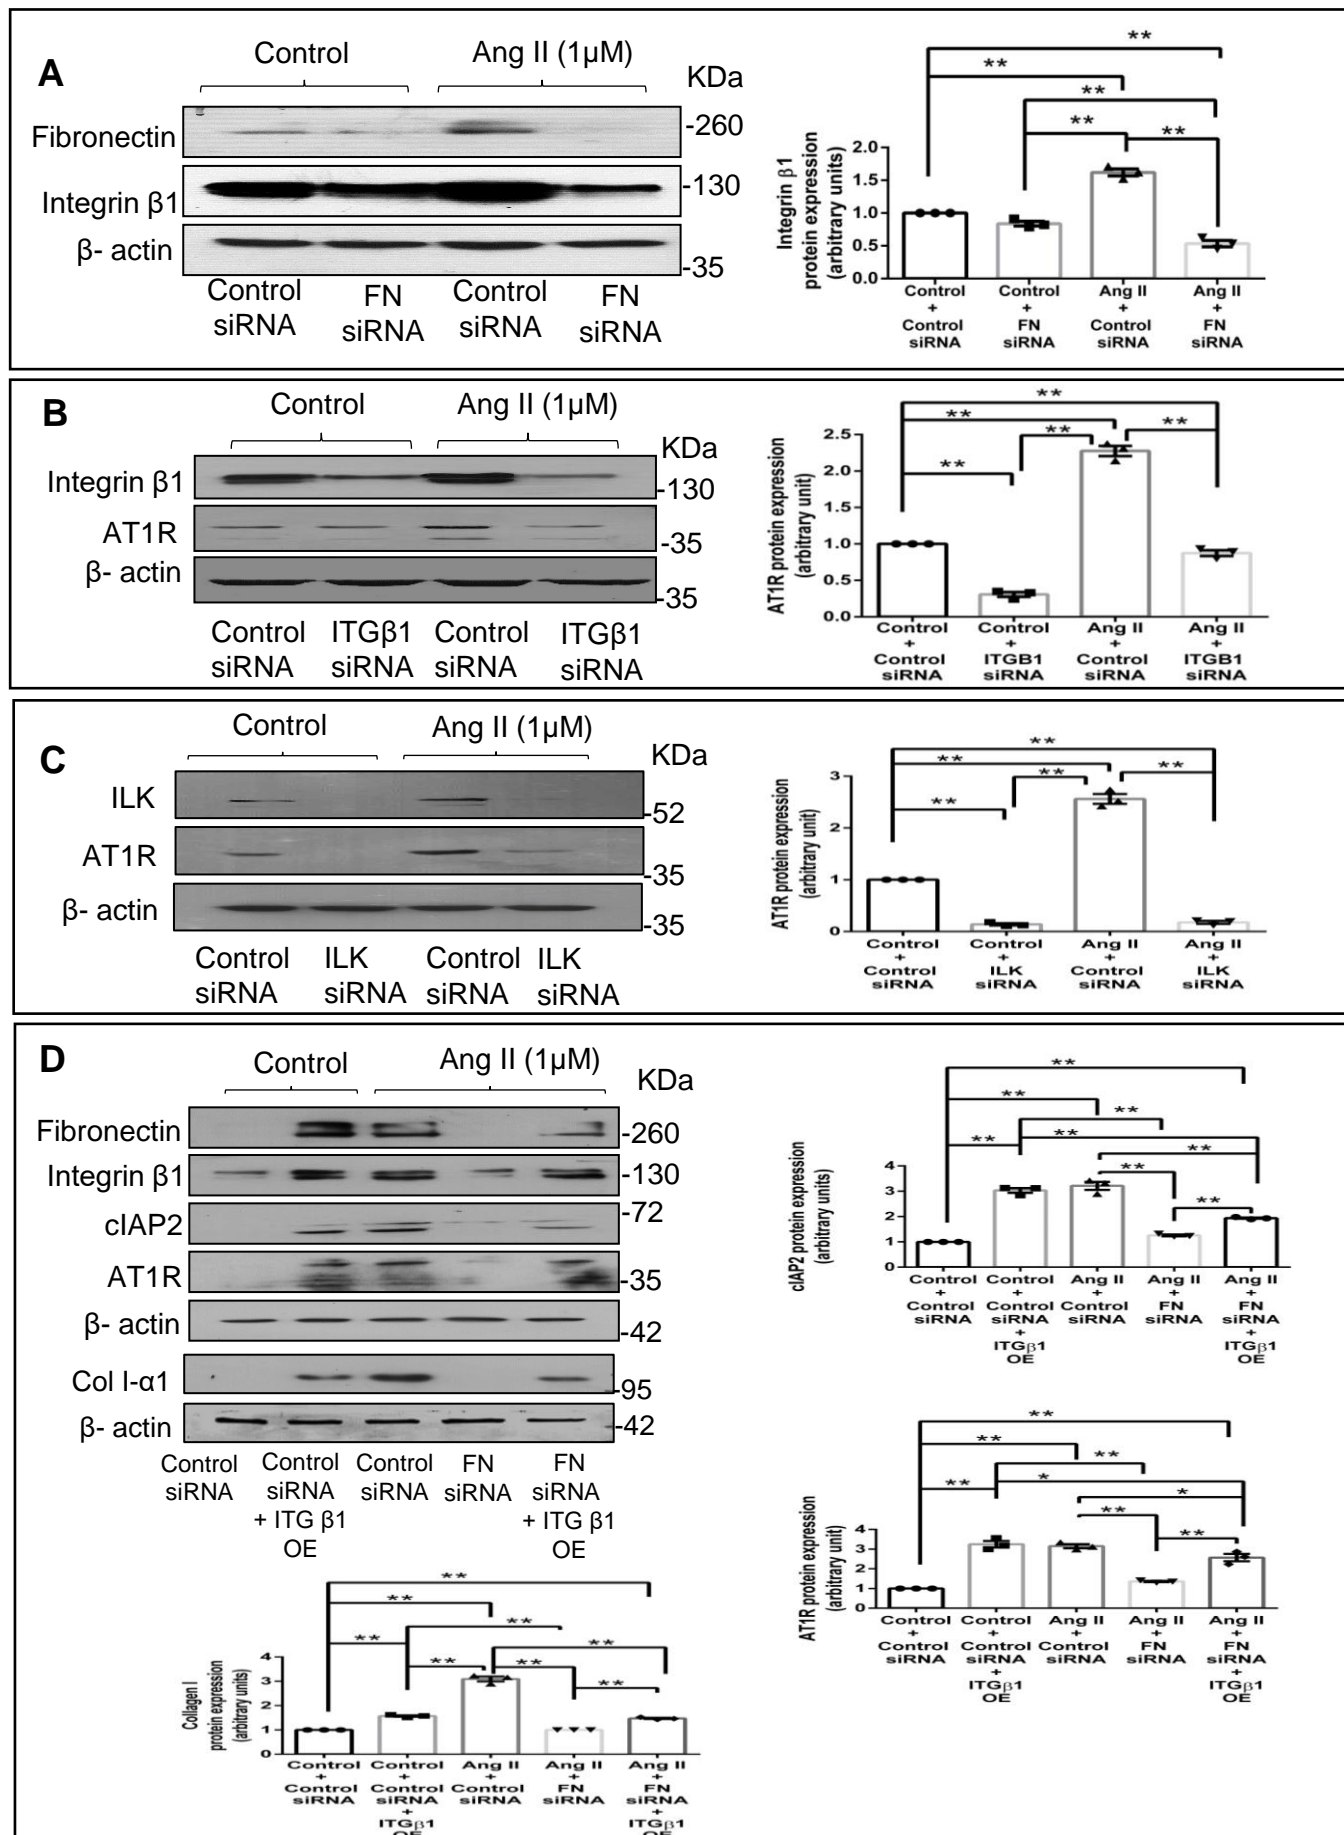

**Figure 5:**

## DDR2 regulates Ang II-stimulated expression of AT1R in cardiac fibroblasts

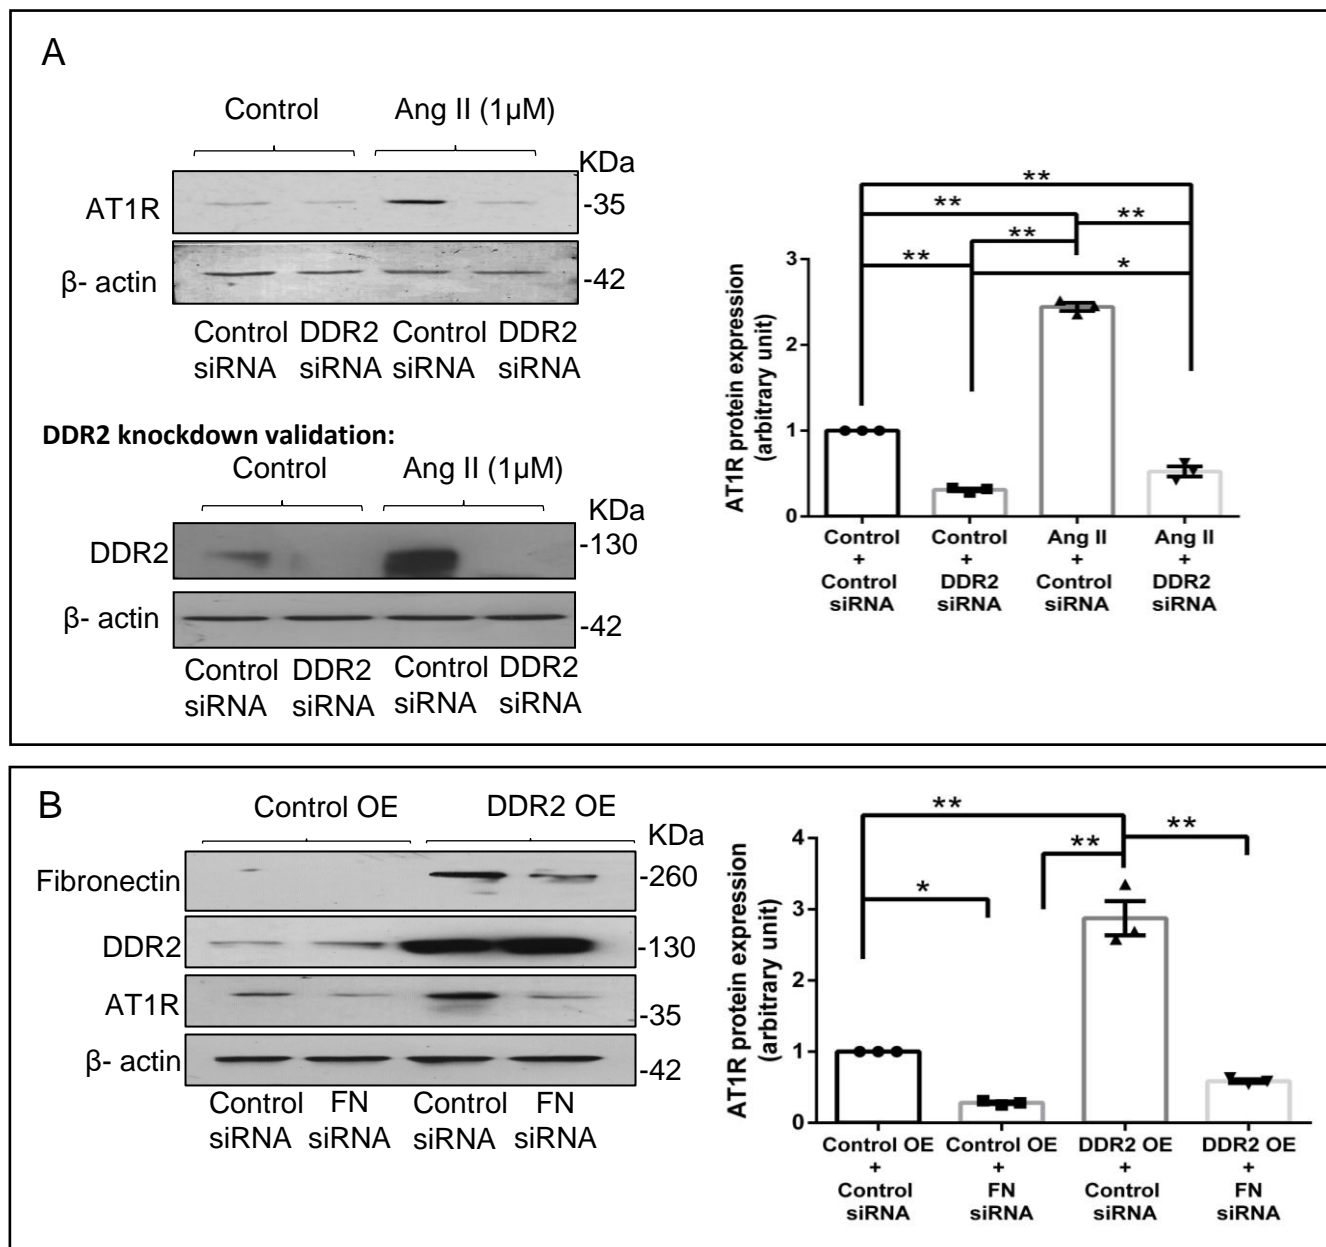

**Figure 6:**

**A schematic depiction of the convergence of ECM and Ang II signalling pathways in cardiac fibroblasts**

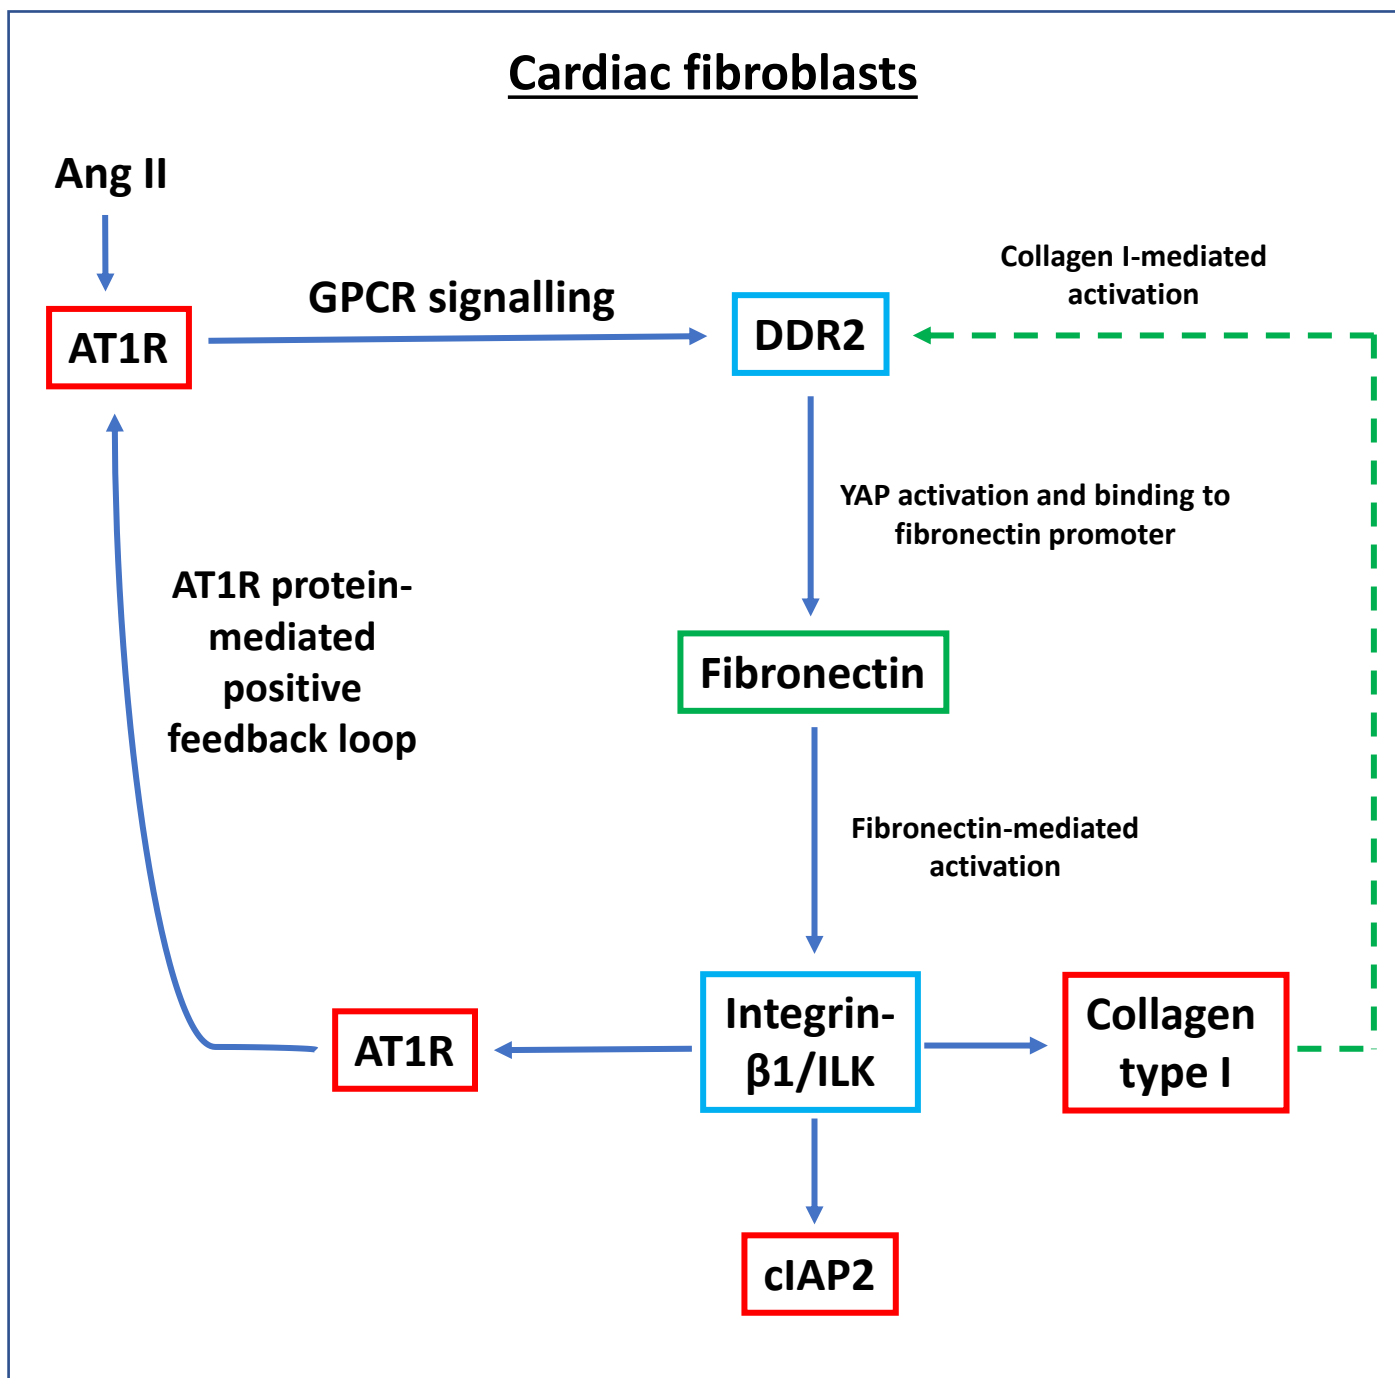

Source: http://biorxiv.org/content/10.1101/2021.05.06.442987v1.full.pdf
